# Supplementary material
Source: Research Square preprint supplement (doi:10.21203/rs.3.rs-9224367/v1)
Supplement: Supplementary file 1 [file 35ee0acd1c7cba3a1e255b3e.docx]

**Reducing Missed Physiotherapy Appointments through an Electronic Appointment Scheduling System: A Quality Improvement Intervention Study in Western Rwanda**

By *Ndererimana et al.*

**Supplementary materials**

**Supplementary Table S1: A tally sheet showing number of voters, percentage, and decision for ranking root causes**

| **N/S** | **Suggested causes** | **Information needed to accept or reject** | **Decision on RCA** |
| --- | --- | --- | --- |
| 1 | Unfavorable conditions of a patient or caregiver. | MA due illness: 21.25% | Accepted |
| MA due pervert or socioeconomic problems: 27.5% | Accepted |
| MA due to forgetting: 55% | Accepted |
| Missing due to personal and family responsibilities: 16.25% | Rejected |
| Missed due to going to another health facility: 8.75%. | Rejected |
| 2 | Insufficient staff | WISN Ratio: 5/2.3 = 2.17 which shows Overstaffing | Rejected |
| 3 | Unsatisfied patients | Overall satisfaction, 59.8% as very satisfied, 31.4 % as satisfied (91.2%) | Rejected |
| 4 | Untrained Staff | Untrained staff 18.2% and trained staff: 81.80%. | Rejected |
| 5 | Weather- related disruption | 41.3% participants had barriers and 58.8% participants had no problem, | Accepted |
|  | Issue of distance | 54(71.1%) missed due length of journey, 22(28.9%) reported not having difficulties | Accepted |
| 6 | Lack of communication tools | 11 staff confirmed availability of all tools | Rejected |
| 7 | Lack of materials and equipment of physiotherapy | Essential materials and equipment 86.2%, and 25.7% for optional materials were all available | Rejected |
| 8 | Ineffective communication | 75.0% have not received text messages, 65% have not received phone call. | Accepted |
|  | Focus Group Discussion | Socioeconomic and family responsibilities, forgetting, miscommunication between health providers were identified as causes of MAs | Accepted |

**Supplementary Table S2: Decision matrix**

| **N/s** | **Suggested solutions** | **Evaluation Criteria (5=good; 1=bad)** | | | | |
| --- | --- | --- | --- | --- | --- | --- |
| **Impact** | **Annual cost** | **Feasibility** | **Time** | **Total** |
| **1** | Automated reminder system | 2 | 3 | 3 | 3 | 11 |
| **2** | Development of **Appointment Scheduling Management System** | 4 | 5 | 4 | 5 | **18** |
| **3** | Follow up system | 1 | 2 | 2 | 4 | 9 |
| **4** | Financial aid and transport assistance transport assistance | 3 | 4 | 2 | 2 | 11 |


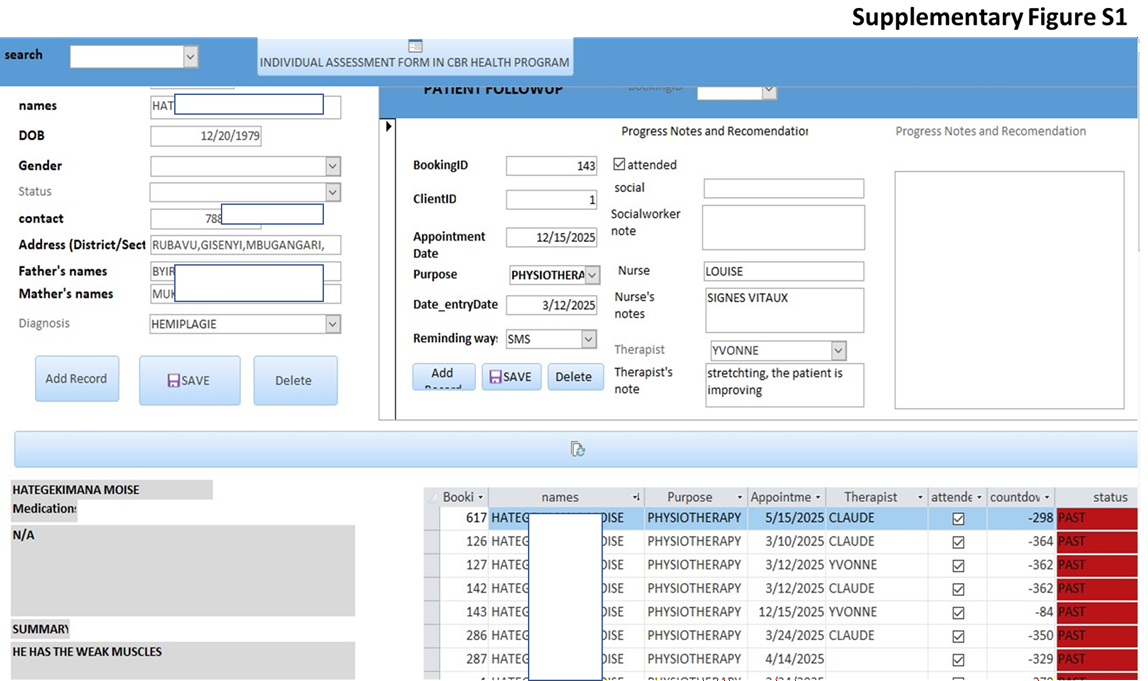


***Supplementary Figure S1: Electronic Appointment Scheduling System (EASS) working interface***


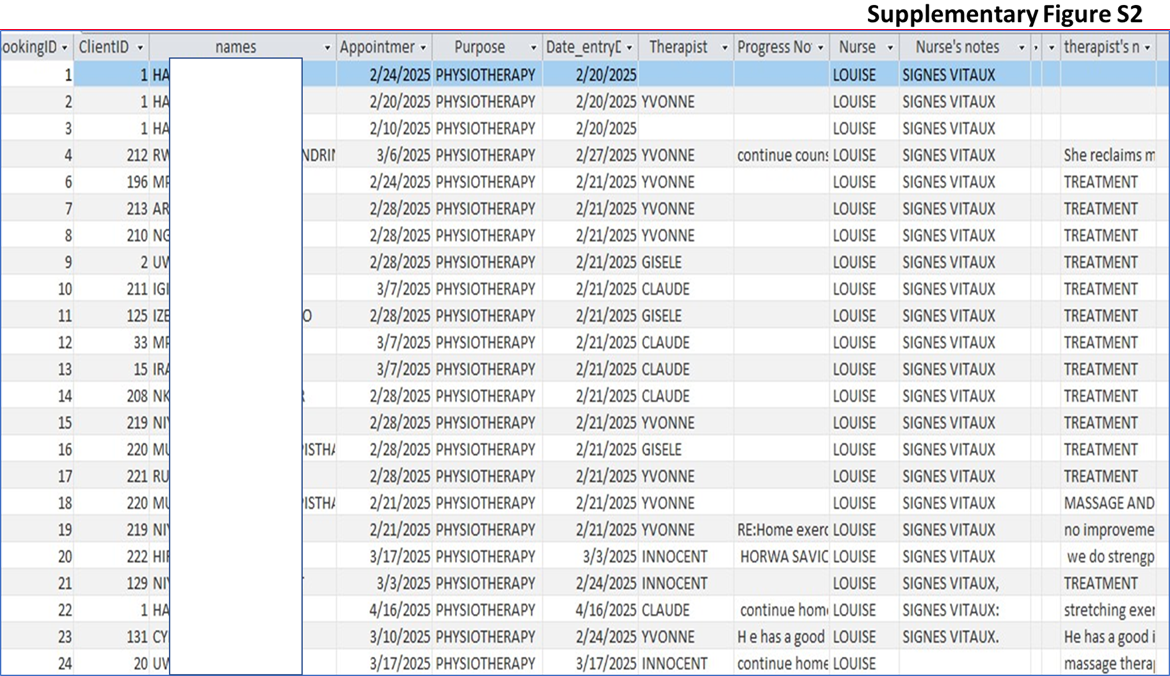


***Supplementary Figure S2: Daily scheduled appointments, patients’ names were hidden for confidentiality purposes.***
